# Supplementary material for: Deactivation studies of a carbon supported AuPt nanoparticulate catalyst in the liquid-phase aerobic oxidation of 1,2-propanediol
Source: Royal Society of Chemistry journal article supplement (doi:10.1039/c4cy00027g), 2014-01-01
Supplement: c4cy00027g1.pdf [file c4cy00027g1.pdf]

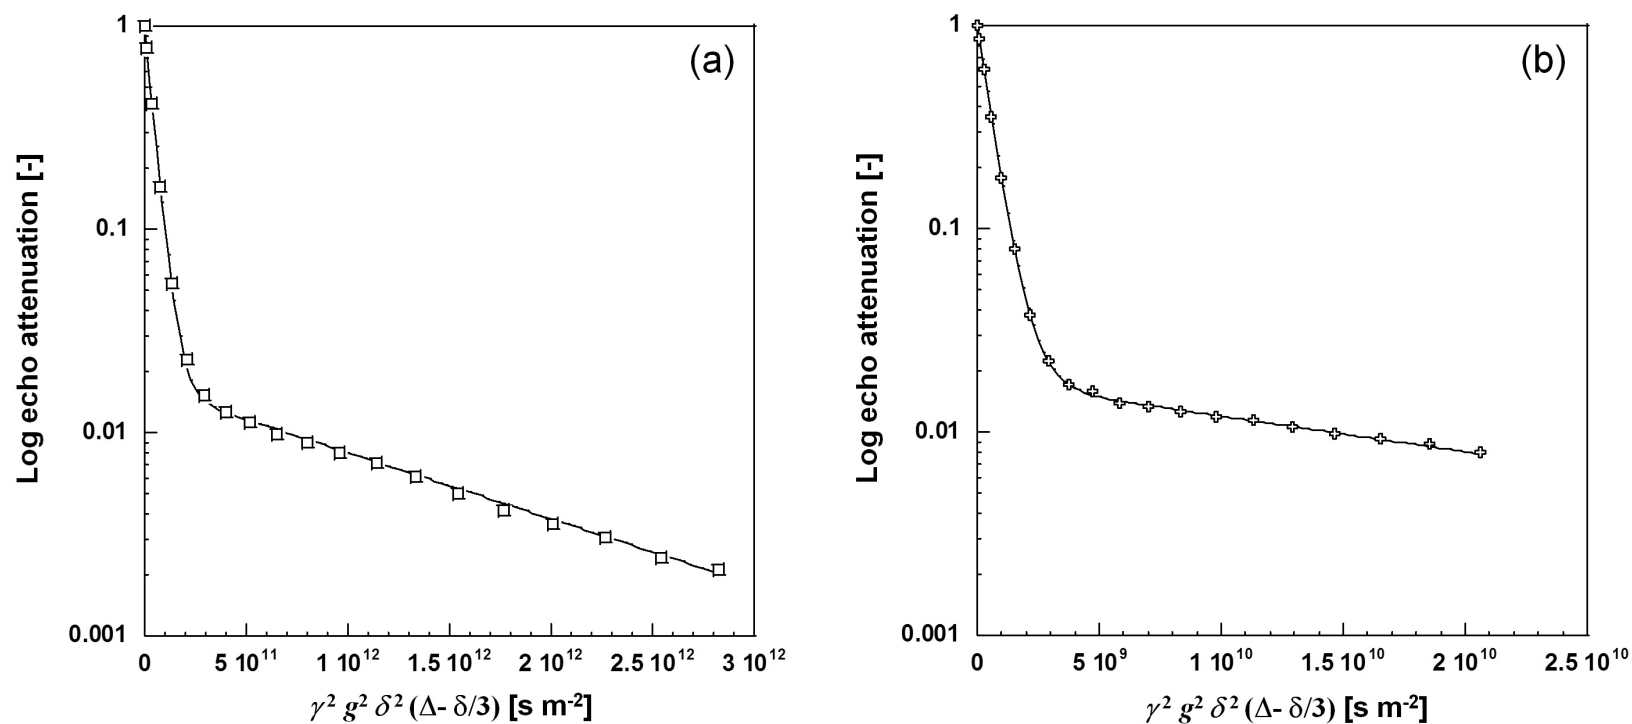

PFG-NMR attenuation plots in fresh AuPt/C plot for : (a) 1,2-propanediol and (b) water. Solid lines are fittings to Equation (1).

**Figure S1**
