# Supplementary material for: Deactivation studies of a carbon supported AuPt nanoparticulate catalyst in the liquid-phase aerobic oxidation of 1,2-propanediol
Source: Royal Society of Chemistry journal article supplement (doi:10.1039/c4cy00027g), 2014-01-01
Supplement: c4cy00027g2.pdf [file c4cy00027g2.pdf]

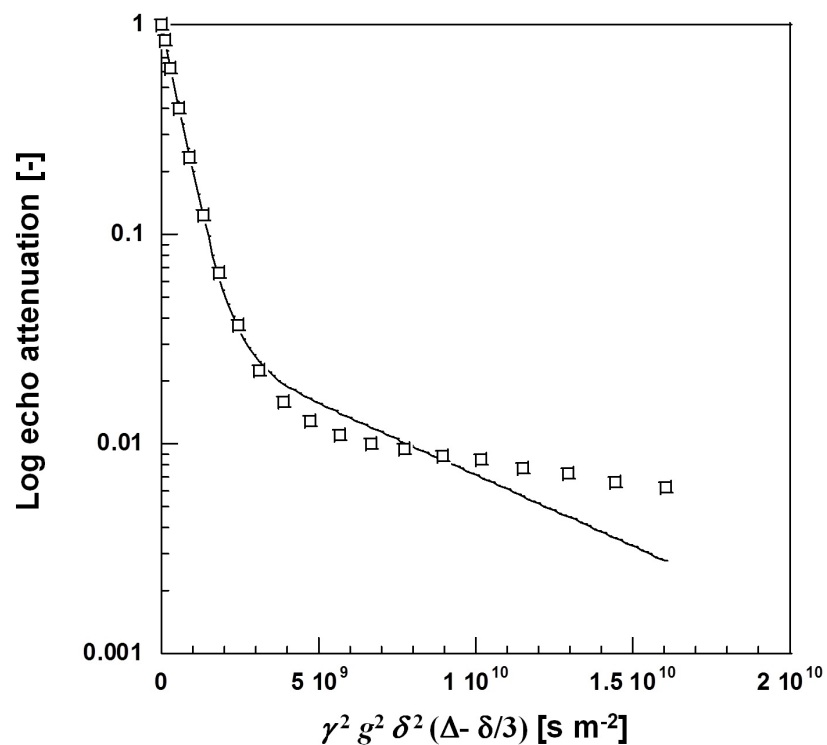

PFG-NMR attenuation data for n-octane in fresh AuPt/C fitted with a two-component diffusion model (solid line).

**Figure S2**
